# Supplementary material for: Domestication Genomics of the Open-Pollinated Scarlet Runner Bean (Phaseolus coccineus L.)
Source: PubMed Central journal article supplement (PMC5694824; doi:10.3389/fpls.2017.01891), 2017-11-15
Supplement: Data_Sheet_1.pdf [file Data_Sheet_1.pdf]

## Supplementary Material

# Domestication Genomics of the open-pollinated Scarlet Runner Bean (*Phaseolus coccineus* L.)

Azalea Guerra-García, Marco Suárez-Atilano, Alicia Mastretta-Yanes, Alfonso Delgado-Salinas, Daniel Piñero

\* **Correspondence:** Azalea Guerra-García: [azalea.guerra@iecologia.unam.mx](mailto:azalea.guerra@iecologia.unam.mx)

**Table S1.** Sampling information

| Species                                        | Status     | State and location         | Latitude | Longitude | Altitude |
|------------------------------------------------|------------|----------------------------|----------|-----------|----------|
| <i>P. coccineus</i><br>subsp. <i>coccineus</i> | Cultivated | Oaxaca, Cuilapam           | 16.99    | -96.78    | 1577     |
| <i>P. coccineus</i><br>subsp. <i>coccineus</i> | Cultivated | Durango                    | NA       | NA        | NA       |
| <i>P. coccineus</i><br>subsp. <i>coccineus</i> | Cultivated | Veracruz, Frijol Colorado  | 19.59    | -97.35    | 2419     |
| <i>P. coccineus</i><br>subsp. <i>coccineus</i> | Cultivated | Chiapas, González León     | 16.51    | -92.06    | 1579     |
| <i>P. coccineus</i><br>subsp. <i>coccineus</i> | Cultivated | España                     | NA       | NA        | NA       |
| <i>P. coccineus</i><br>subsp. <i>coccineus</i> | Cultivated | Chiapas, Nahá              | 16.94    | -91.59    | 917      |
| <i>P. coccineus</i><br>subsp. <i>coccineus</i> | Cultivated | Veracruz, Orilla del Monte | 19.66    | -97.29    | 2402     |
| <i>P. coccineus</i><br>subsp. <i>coccineus</i> | Cultivated | Chaipas, Oxchuc            | 16.80    | -92.32    | 2001     |
| <i>P. coccineus</i><br>subsp. <i>coccineus</i> | Cultivated | Puebla, Tlalanecaneca      | 19.36    | -98.51    | 2372     |
| <i>P. coccineus</i><br>subsp. <i>coccineus</i> | Cultivated | Durango, Regocijo          | 23.68    | -105.12   | 2566     |
| <i>P. coccineus</i><br>subsp. <i>coccineus</i> | Cultivated | Durango, Villa Unión       | 23.97    | -104.04   | 1901     |
| <i>P. coccineus</i><br>subsp. <i>coccineus</i> | Cultivated | Puebla                     | NA       | NA        | NA       |
| <i>P. coccineus</i><br>subsp. <i>coccineus</i> | Feral      | Veracruz, Altotonga        | 19.75    | -97.25    | 1959     |

|                                                |                  |                                 |       |         |      |
|------------------------------------------------|------------------|---------------------------------|-------|---------|------|
| <i>P. coccineus</i><br>subsp. <i>coccineus</i> | Feral            | Oaxaca, Huautla                 | 18.10 | -96.83  | 1746 |
| <i>P. coccineus</i><br>subsp. <i>coccineus</i> | Feral            | Chiapas, Zicanantán             | 16.75 | -92.73  | 2408 |
| <i>P. coccineus</i><br>subsp. <i>coccineus</i> | Breeding<br>line | Blanco Tlaxcala                 | NA    | NA      | NA   |
| <i>P. coccineus</i><br>subsp. <i>coccineus</i> | Wild             | Jalisco, Ciudad<br>Gúzman       | 19.58 | -103.53 | 2100 |
| <i>P. coccineus</i><br>subsp. <i>coccineus</i> | Wild             | Oaxaca,<br>Comaltepec           | 17.55 | -96.53  | 2876 |
| <i>P. coccineus</i><br>subsp. <i>coccineus</i> | Wild             | Durango, Espinazo<br>del Diablo | 23.64 | -105.82 | 1422 |
| <i>P. coccineus</i><br>subsp. <i>coccineus</i> | Wild             | Durango, Regocijo               | 23.68 | -105.12 | 2566 |
| <i>P. coccineus</i><br>subsp. <i>coccineus</i> | Wild             | Ciudad de México,<br>REPSA      | 19.32 | -99.20  | 2328 |
| <i>P. coccineus</i><br>subsp. <i>coccineus</i> | Wild             | Querétaro, San<br>Joaquín       | 20.93 | -99.56  | 2381 |
| <i>P. coccineus</i><br>subsp. <i>coccineus</i> | Wild             | Chiapas, San<br>Cristóbal       | 16.70 | -92.60  | 2229 |
| <i>P. coccineus</i><br>subsp. <i>coccineus</i> | Wild             | Morelos, Tepoztlán              | 19.00 | -99.13  | 1953 |
| <i>P. coccineus</i><br>subsp. <i>coccineus</i> | Wild             | Ciudad de México,<br>Tlalpan    | 19.29 | -99.19  | 2334 |
| <i>P. coccineus</i><br>subsp. <i>striatus</i>  | Wild             | Morelos, Tres<br>Marías         | 19.10 | -99.21  | 3024 |
| <i>P. dumosus</i>                              | Cultivated       | Veracruz, Altotonga             | 19.75 | -97.25  | 1959 |
| <i>P. dumosus</i>                              | Cultivated       | Chiapas,<br>Chiquinivalvo       | 16.71 | -92.86  | 1467 |
| <i>P. dumosus</i>                              | Cultivated       | Puebla, Cuetzalan               | 19.99 | -97.54  | 1684 |
| <i>P. dumosus</i>                              | Cultivated       | Oaxaca, Huautla                 | 18.10 | -96.83  | 1746 |
| <i>P. dumosus</i>                              | Cultivated       | Chiapas, Motozintla             | 15.43 | -92.33  | 2671 |
| <i>P. dumosus</i>                              | Cultivated       | Chiapas, Talquián               | 15.09 | -92.08  | 1728 |
| <i>P. vulgaris</i>                             | Cultivated       | España                          | NA    | NA      | NA   |
| <i>P. vulgaris</i>                             | Wild             | Jalisco                         | NA    | NA      | NA   |
| <i>P. vulgaris</i>                             | Wild             | Ciudad de México,<br>REPSA      | 19.32 | -99.20  | 2328 |
| <i>P. vulgaris</i>                             | Wild             | Morelos, Yautepec               | 18.95 | -99.08  | 1386 |

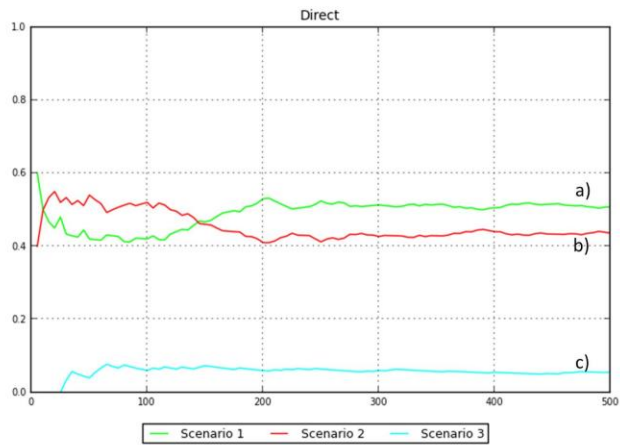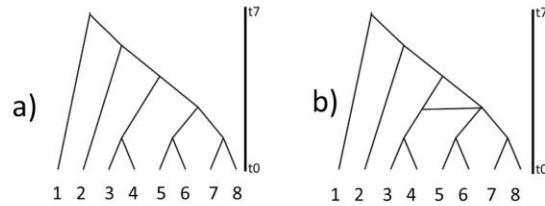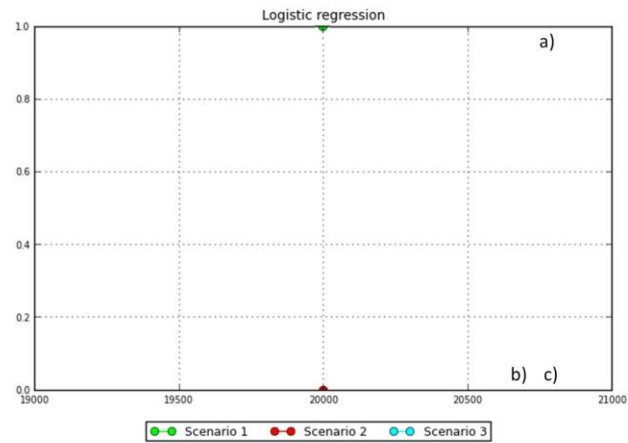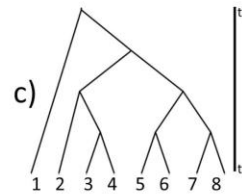

**Figure S1.** Posterior probabilities (Direct and Logistic) of the three main domestication scenarios tested with DIYABC, among eight wild and cultivated populations of *Phaseolus coccineus* in Mexico. In this preliminary evaluation: a) monophyletic origin of Wild populations b) and c) paraphyletic relationships among Wild populations.

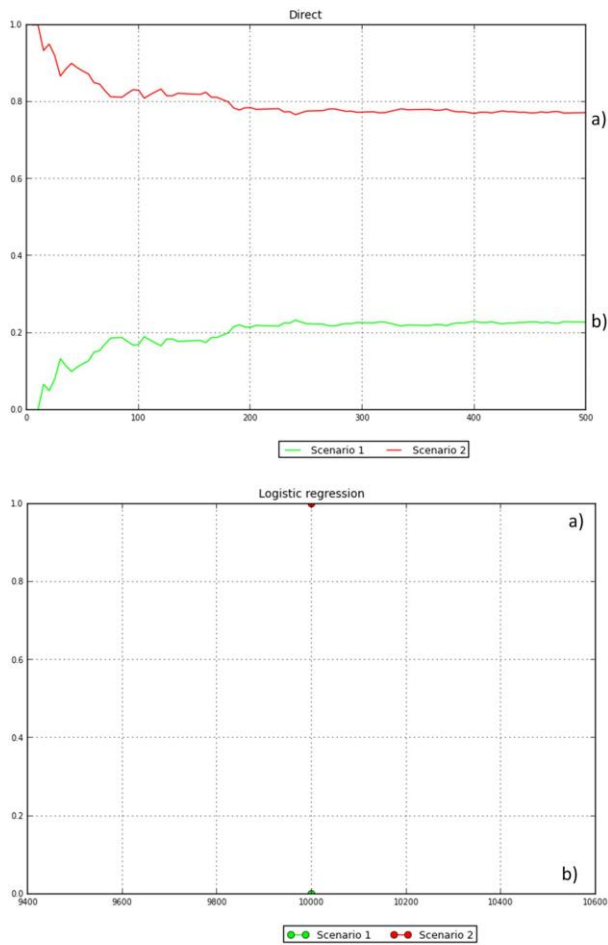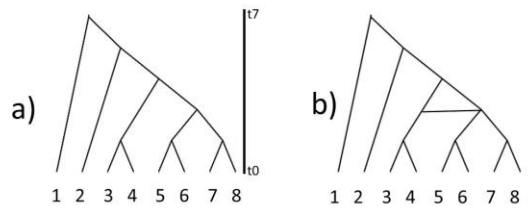

**Figure S2.** Posterior probabilities (Direct and Logistic) of the two previously selected domestication scenarios tested with DIYABC among eight wild and cultivated populations of *Phaseolus coccineus* in Mexico. Both scenarios reflect a paraphyletic relationship among Wild populations and a) with one contribution in time of Wild Populations into Cultivated ancestral genetic pool and b) with several contributions events in time of Wild Populations into Cultivated ancestral genetic pool

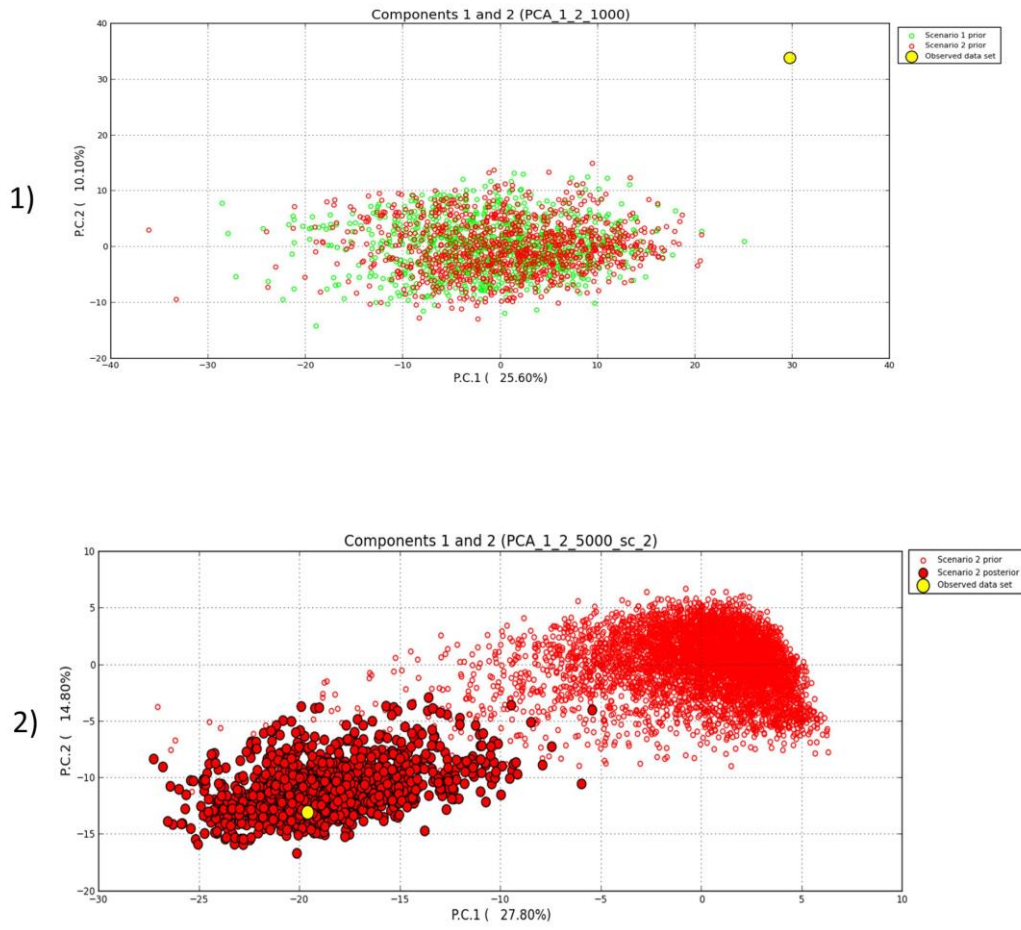

**Figure S3.** Principal component analyses of the a) Pre-evaluate scenario prior combinations of two selected scenarios in which paraphyletic relationship among Wild populations are represented and b) Model checking of the selected scenario indicating a single contribution in time of Wild Populations into Cultivated ancestral genetic pool

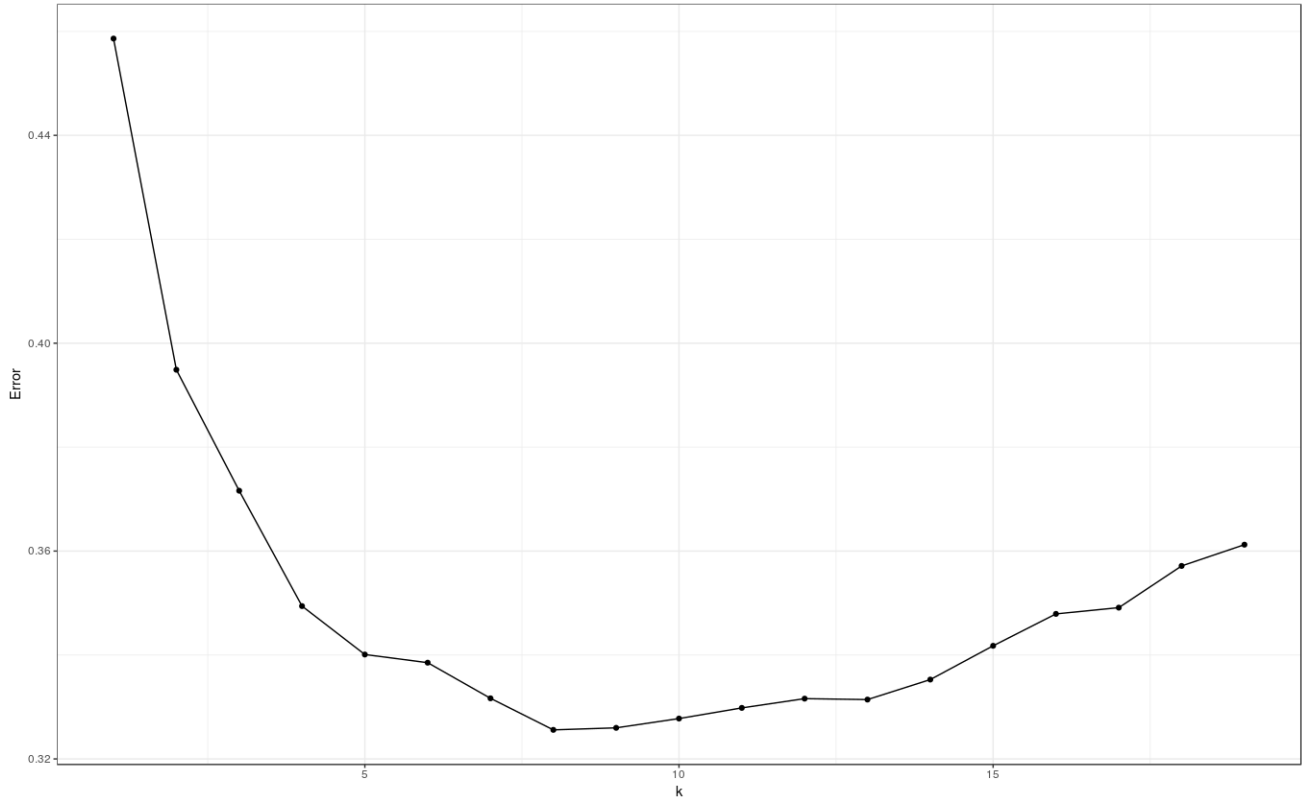

**Figure S4.** Cross-validation errors among  $K$  values using Admixture software for the *P. coccineus* data set.

**Table S2.** Heterozygosity and inbreeding coefficient statistics of *P. coccineus* samples grouped by population.

| <b>Genetic cluster</b> | <b>Population</b>   | <b><math>H_O</math></b> | <b><math>H_E</math></b> | <b><math>F_{IS}</math> (95% CI)</b> |
|------------------------|---------------------|-------------------------|-------------------------|-------------------------------------|
| Cult-OV                | Cuicuilapam         | 0.171                   | 0.148                   | -0.152 (-0.164--0.142)              |
| Cult-SMOCC             | Blanco Tlaxcala     | 0.194                   | 0.167                   | -0.159 (-0.168--0.150)              |
|                        | Durango             | 0.218                   | 0.173                   | -0.262 (-0.270--0.253)              |
|                        | Regocijo            | 0.205                   | 0.160                   | -0.280 (-0.293--0.273)              |
|                        | Villa Unión         | 0.179                   | 0.167                   | -0.072 (-0.083--0.063)              |
| Cult-SUR-CH            | Altotonga           | 0.215                   | 0.177                   | -0.216 (-0.225--0.208)              |
|                        | González de León    | 0.200                   | 0.176                   | -0.135 (-0.144--0.126)              |
|                        | Huautla             | 0.219                   | 0.199                   | -0.103 (-0.112--0.095)              |
|                        | Nahá                | 0.196                   | 0.167                   | -0.171 (-0.182--0.162)              |
|                        | Oxchuc              | 0.200                   | 0.178                   | -0.124 (-0.133--0.114)              |
|                        | Zicanantán          | 0.196                   | 0.191                   | -0.029 (-0.091--0.064)              |
| Cult-TMVB              | España              | 0.166                   | 0.134                   | -0.237 (-0.253--0.230)              |
|                        | Frijol Colorado     | 0.193                   | 0.191                   | -0.009 (-0.018-0.000)               |
|                        | Orilla del Monte    | 0.221                   | 0.195                   | -0.133 (-0.142--0.125)              |
|                        | Tlalcananeca        | 0.199                   | 0.190                   | -0.044 (-0.053--0.036)              |
|                        | Puebla              | 0.206                   | 0.191                   | -0.079 (-0.089--0.070)              |
| Wild-SMOCC             | Espinazo del Diablo | 0.150                   | 0.118                   | -0.274 (-0.293--0.268)              |
|                        | Regocijo-S          | 0.165                   | 0.141                   | -0.173 (-0.189--0.166)              |
| Wild-striatus          | Tres Marías         | 0.203                   | 0.160                   | -0.267 (-0.277--0.261)              |
| Wild-SUR-CH            | Comaltepec          | 0.189                   | 0.157                   | -0.200 (-0.231--0.207)              |
|                        | San Cristobal       | 0.182                   | 0.164                   | -0.105 (-0.125--0.102)              |
| Wild-TMVB              | Ciudad Guzman       | 0.169                   | 0.176                   | -0.072 (-0.088--0.056)              |
|                        | REPSA               | 0.237                   | 0.202                   | -0.175 (-0.183--0.168)              |
|                        | San Joaquín         | 0.195                   | 0.160                   | -0.221 (-0.235--0.216)              |
|                        | Tepoztlán           | 0.229                   | 0.188                   | -0.217 (-0.225--0.210)              |
|                        | Tlalpan             | 0.247                   | 0.208                   | -0.184 (-0.192--0.177)              |

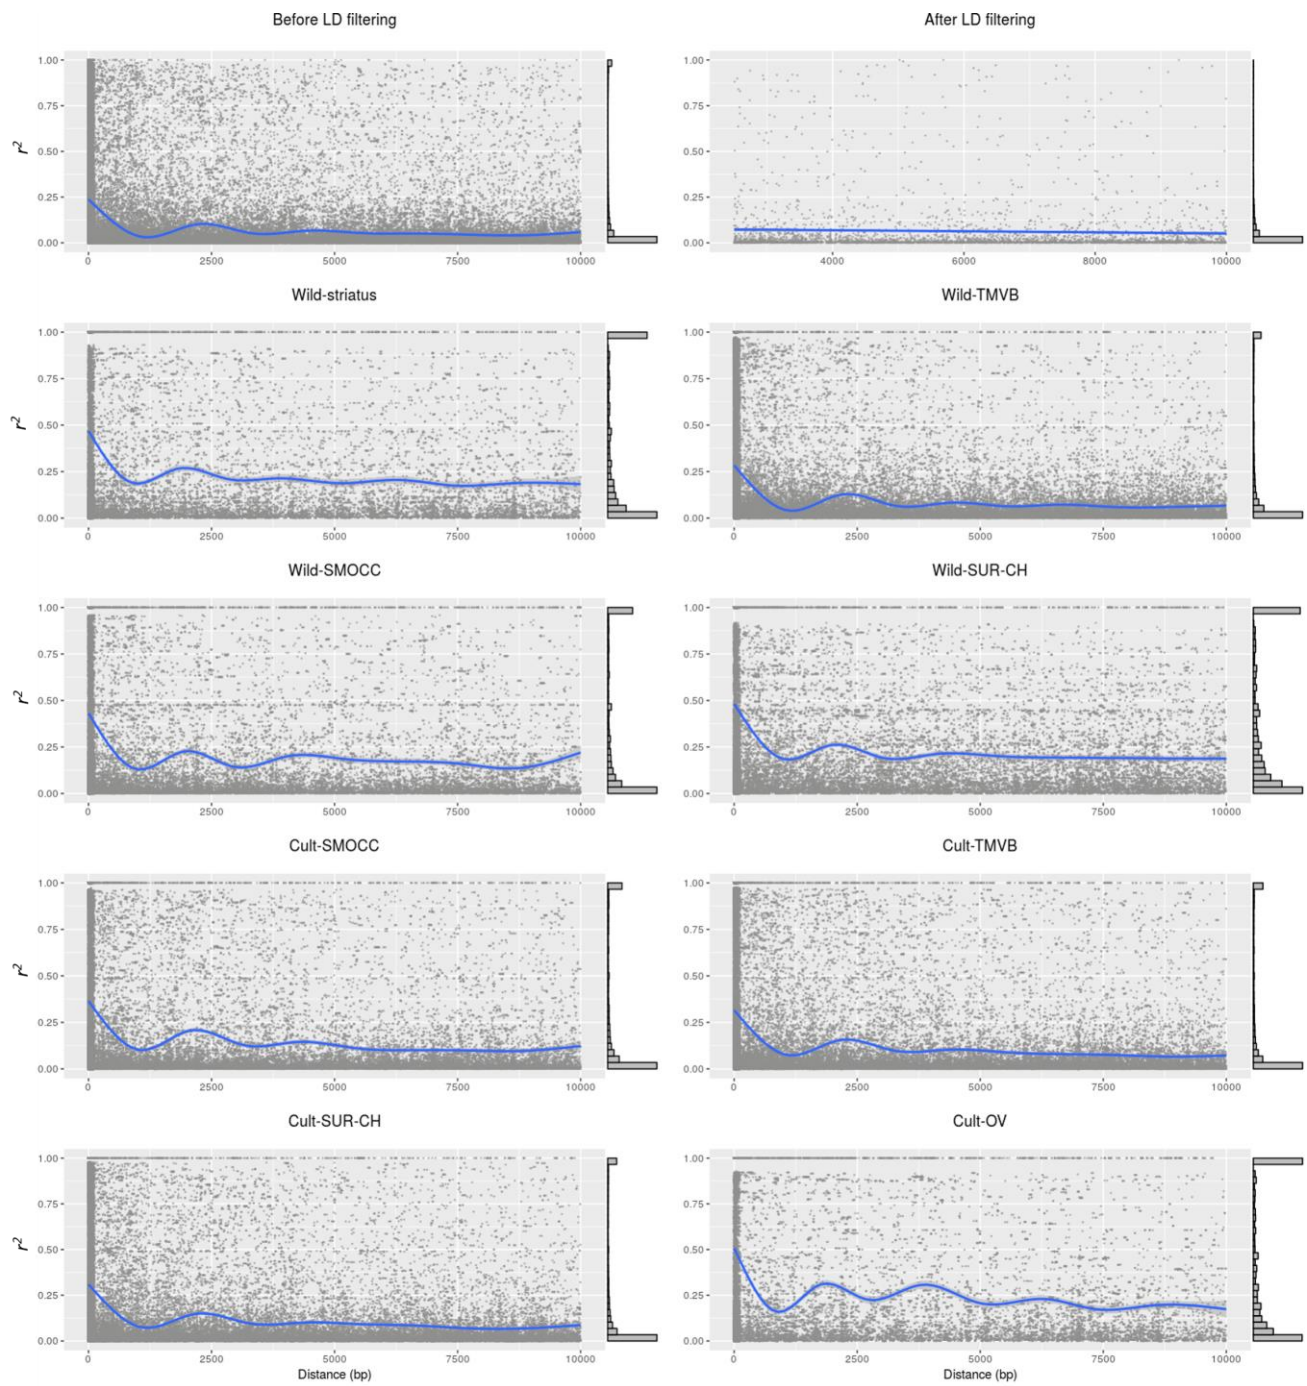

**Figure S5.** Pair  $r^2$  value among SNPs located in the same chromosome separated by a maximum distance of 10 000 bp. At the right side of each plot there is a histogram showing the frequency of  $r^2$  values.



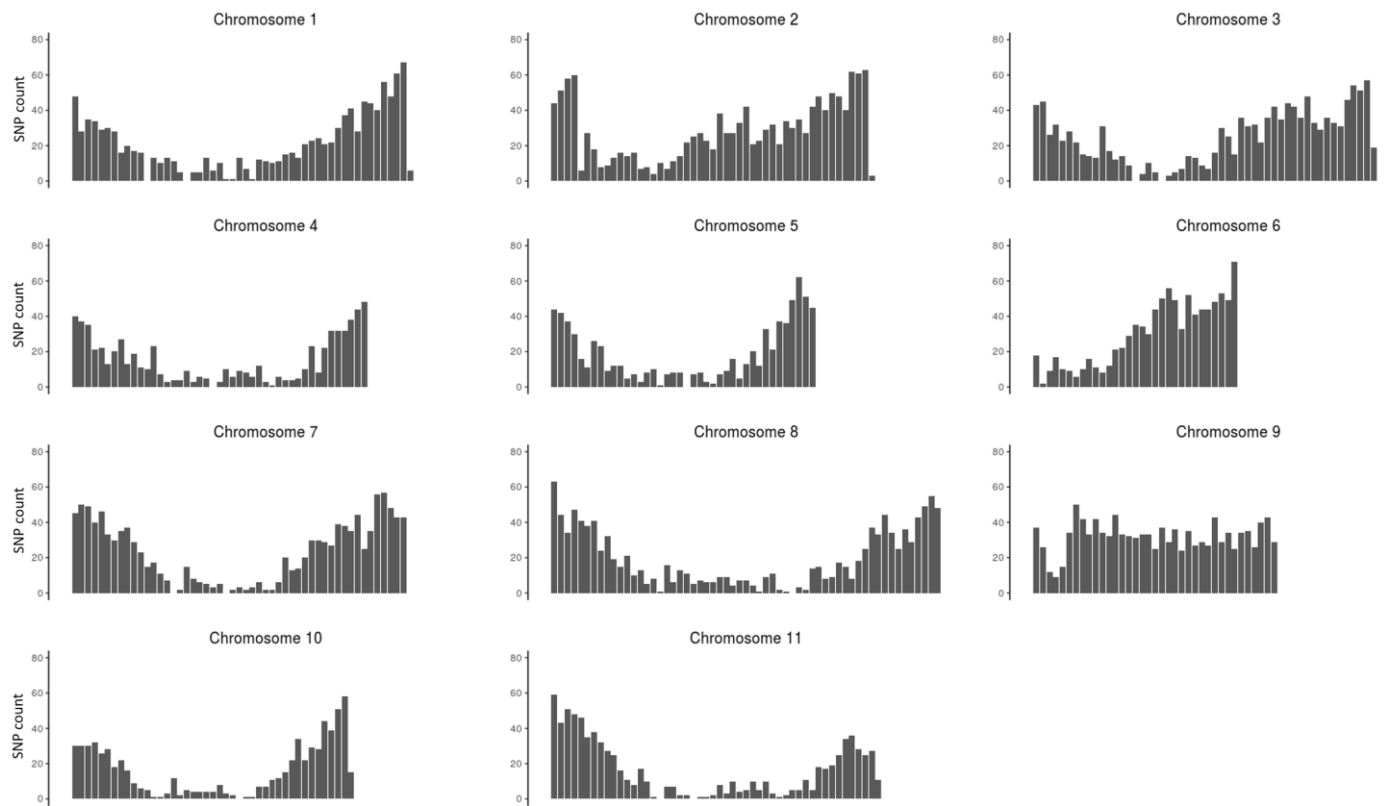

**Figure S6.** Distribution of 11 693 SNPs detected in *P. coccineus* (after LD filtering) present in each chromosome. Each bar represents a region of one Mb. The differences in plots sizes show the discrepancies in chromosomes lengths.

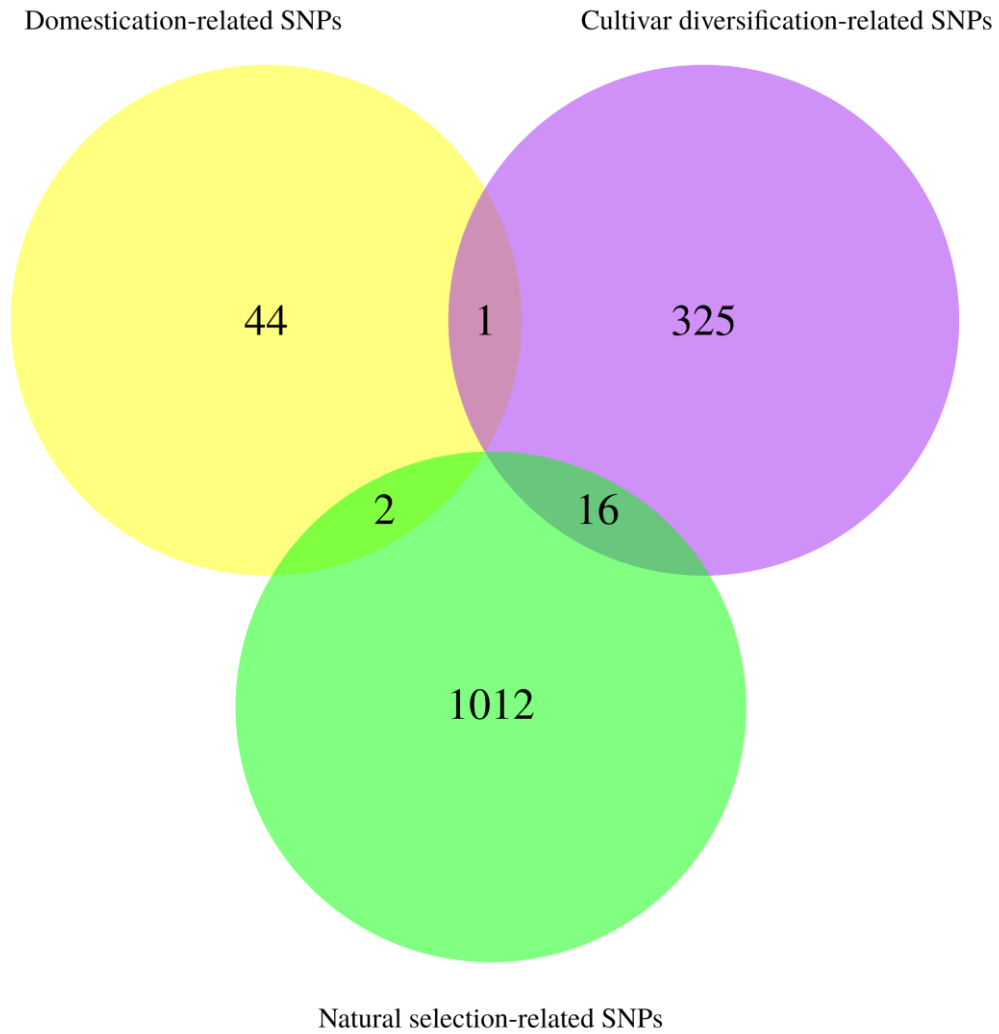

**Figure S7.** Venn diagram showing share candidate SNPs detected in the three PCAdapt analysis to detect natural and artificial selective pressures.

**Table S3.** Candidate loci identified by the pcadapt and BayeScan methods.

| Chr                             | SNP ID   | Position         | <i>P. vulgaris</i> transcript name | Annotation | High expression tissue | Protein homologs in <i>G. max</i> |
|---------------------------------|----------|------------------|------------------------------------|------------|------------------------|-----------------------------------|
| Domestication-related candidate |          |                  |                                    |            |                        |                                   |
| 1S1_15176129                    | 15176129 |                  |                                    |            |                        |                                   |
| 1S1_48602792                    | 48602792 | Phvul.001G232200 | Phosphomethylpyrimidine kinase     |            | Flower, buds           | Glyma.11G218700                   |
| 2S1_56416681                    | 4211050  |                  |                                    |            |                        |                                   |
| 2S1_79642304                    | 27436673 |                  |                                    |            |                        |                                   |
| 2S1_81673246                    | 29467615 | Phvul.002G145600 | TIR domain                         |            | Green and mature pods  | Glyma.12G135600                   |
| 2S1_85681762                    | 33476131 |                  |                                    |            |                        |                                   |
| 2S1_86298230                    | 34092599 |                  |                                    |            |                        |                                   |
| 3S1_128138350                   | 26891681 |                  |                                    |            |                        |                                   |
| 3S1_145377297                   | 44130628 |                  |                                    |            |                        |                                   |
| 6S1_248268696                   | 7958113  |                  |                                    |            |                        |                                   |
| 6S1_250412008                   | 10101425 |                  |                                    |            |                        |                                   |
| 6S1_252913073                   | 12602490 |                  |                                    |            |                        |                                   |
| 6S1_259648113                   | 19337530 |                  |                                    |            |                        |                                   |
| 6S1_262918075                   | 22607492 |                  |                                    |            |                        |                                   |
| 7S1_310062177                   | 37774238 | Phvul.007G256000 | DnaJ domain                        |            | Flowers, young pods    | Glyma.02G179900                   |
| 7S1_313970760                   | 41682821 |                  |                                    |            |                        |                                   |
| 8S1_329571814                   | 5525253  |                  |                                    |            |                        |                                   |
| 8S1_350061425                   | 26014864 |                  |                                    |            |                        |                                   |
| 8S1_350157505                   | 26110944 |                  |                                    |            |                        |                                   |
| 8S1_375823077                   | 51776516 |                  |                                    |            |                        |                                   |
| 9S1_406871596                   | 23162403 | Phvul.009G156400 | Dehydrogenase E1 component         |            | Flower buds, flowers   | Glyma.04G212100                   |

11S1\_467512979 3058827

11S1\_470314329 5860177

11S1\_472148556 7694404

---

Natural selection-related candidate windows

---

3S1\_103319613 2072944

3S1\_108854438 7607769

3S1\_126647289 25400620

3S1\_138412433 37165764

3S1\_141480201 40233532

3S1\_143433256 42186587Phvul.003G197500 Calmodulin binding protein-like Root, stem Glyma.17G092700

---

Cultivar diversification-related candidate loci

---

1S1\_45827637 45827637

3S1\_146749207 45502538

4S1\_178058430 24527352

4S1\_178200752 24669674

4S1\_178417950 24886872

4S1\_181150184 27619106

4S1\_183310744 29779666

5S1\_219843009 20351812

5S1\_220112744 20621547

5S1\_225806704 26315507

6S1\_271294756 30984173

7S1\_301822240 29534301

9S1\_388863253 5154060

---
